1 **Detection and genome sequencing of SARS-CoV-2 belonging to the B.1.1.7 lineage in the Philippines**

2  
3 Francis A. Tablizo<sup>1</sup>, Cynthia P. Saloma<sup>2,7\*</sup>, Marc Jerrone R. Castro<sup>1</sup>, Kenneth M. Kim<sup>1</sup>, Maria Sofia L.  
4 Yangzon<sup>1</sup>, Carlo M. Lapid<sup>1</sup>, Benedict A. Maralit<sup>3</sup>, Marc Edsel C. Ayes<sup>4</sup>, Jan Michael C. Yap<sup>1</sup>, Jo-Hannah S.  
5 Llames<sup>3</sup>, Shiela Mae M. Araiza<sup>3</sup>, Kris P. Punayan<sup>3</sup>, Irish Coleen A. Asin<sup>3</sup>, Candice Francheska B.  
6 Tambaoan<sup>3</sup>, Asia Louisa U. Chong<sup>3</sup>, Karol Sophia Agape R. Padilla<sup>3</sup>, Rianna Patricia S. Cruz<sup>1</sup>, El King D.  
7 Morado<sup>1</sup>, Joshua Gregor A. Dizon<sup>1</sup>, Eva Maria Cutiongco-de la Paz<sup>2,7</sup>, Alethea R. de Guzman<sup>5</sup>, Razel Nikka  
8 M. Hao<sup>6</sup>, Arianne A. Zamora<sup>5</sup>, Devon Ray Pacial<sup>5</sup>, Juan Antonio R. Magalang<sup>5</sup>, Marissa Alejandria<sup>7</sup>, Celia  
9 Carlos<sup>7</sup>, Anna Ong-Lim<sup>7</sup>, Edsel Maurice Salvaña<sup>7</sup>, John Q. Wong<sup>7</sup>, Jaime C. Montoya<sup>7</sup>, and Maria Rosario  
10 Singh-Vergeire<sup>7</sup>

11

12 \* To whom correspondence should be addressed. Email address: [cpsaloma@up.edu.ph](mailto:cpsaloma@up.edu.ph)

13

14 <sup>1</sup> Core Facility for Bioinformatics, Philippine Genome Center, University of the Philippines System

15 <sup>2</sup> Philippine Genome Center, University of the Philippines System

16 <sup>3</sup> DNA Sequencing Core Facility, Philippine Genome Center, University of the Philippines System

17 <sup>4</sup> Clinical Genomics Laboratory, Philippine Genome Center, University of the Philippines System

18 <sup>5</sup> Epidemiology Bureau, Department of Health, Philippines

19 <sup>6</sup> Disease Prevention and Control Bureau, Department of Health, Philippines

20 <sup>7</sup> Inter-Agency Task Force on Emerging Infectious Diseases (IATF) Task Force on COVID-19 Variants,  
21 Department of Health, Philippines

22 **ABSTRACT**

23 We report the sequencing and detection of 39 Severe Acute Respiratory Syndrome Coronavirus 2 (SARS-  
24 CoV-2) samples containing lineage-defining mutations specific to viruses belonging to the B.1.1.7 lineage  
25 (UK variant) in the Philippines.

26

27 **ANNOUNCEMENT**

28 The Coronavirus Disease 2019 (COVID-19) is an infectious disease that has gained pandemic status from  
29 the World Health Organization, with millions of cases and deaths recorded worldwide. This global health  
30 crisis is caused by viruses referred to as Severe Acute Respiratory Syndrome Coronavirus 2 (SARS-CoV-2),  
31 a member of the genus *Betacoronavirus* (Coronaviridae) together with the causative agents of the first  
32 SARS outbreak in 2003 and the Middle East Respiratory Syndrome (MERS) in 2012.

33

34 In this study, we present the genome sequences of 39 cases of COVID-19 in the Philippines caused by  
35 viruses belonging to SARS-CoV-2 lineage B.1.1.7, more commonly known as the United Kingdom (UK)  
36 variant. This particular SARS-CoV-2 variant was initially identified in the United Kingdom and has been  
37 reported to cause a surge of COVID-19 infections in the said country (Kirby, 2021). Initial studies also  
38 suggest that the B.1.1.7 viruses appear to have replicative advantage (Grabowski et al., 2021) and are  
39 more transmissible (Leung et al., 2021).

40

41 A total of 39 Philippine SARS-CoV-2 samples were classified under the B.1.1.7 lineage. **Table 1** shows the  
42 primary consensus assembly metrics for these samples. The average depth of coverage across all the  
43 sequences is 1,128x, with 33 of the samples carrying all 17 hallmark mutations of the B.1.1.7 lineage as  
44 listed in the PANGO Lineages report for the B.1.1.7 variant of concern ([https://cov-](https://cov-lineages.org/global_report_B.1.1.7.html)  
45 [lineages.org/global\\_report\\_B.1.1.7.html](https://cov-lineages.org/global_report_B.1.1.7.html)).

46

47 The detection of B.1.1.7 from returning overseas Filipino workers and in the community highlights the  
48 need for genomic surveillance at the country's ports of entry and the general population to monitor the  
49 importation and local transmission of emerging variants of concern that may impact the public health  
50 response to the SARS-CoV-2 pandemic in the Philippines.

51

52

### 53 **METHODS**

54 In order to detect the entry of B.1.1.7 infection in the Philippines, nasopharyngeal swabs were collected  
55 between December 10, 2020 and January 31, 2021 from COVID-19 cases detected in returning overseas  
56 Filipinos, as well as from local case clusters mainly from the Cordillera Administrative Region of the  
57 country, among others. The collected swab samples were subjected to RNA extraction using the QIAamp  
58 Viral RNA Mini Kit, the product of which were then used as templates for the amplicon-based Illumina  
59 COVIDSeq Test (<https://www.illumina.com/products/by-type/ivd-products/covidseq.html>) sequencing  
60 workflow. Afterwards, the resulting sequence reads were mapped to the reference SARS-CoV-2 genome  
61 (NCBI Accession Number [NC\\_045512.2](#)) using Minimap2 (Li, 2018) version 2.17-r941, with the `-x sr`  
62 parameter for short accurate genomic reads alignment.

63

64 Primer clipping and quality trimming, intrahost variant calling, removal of reads associated with  
65 mismatched primer indices, and consensus sequence assembly were all done following the suggested  
66 workflow of iVar (Grubaugh et al., 2019) version 1.2.2, using default parameters. The consensus variants  
67 were identified by comparing the resulting assemblies with the reference sequence using MUMmer  
68 (Kurtz et al., 2004) as implemented in the RATT software (Otto et al., 2011). Lastly, SARS-CoV-2 lineage

69 classifications were assigned using Pangolin version 2.3.2 ([github.com/cov-lineages/pangolin](https://github.com/cov-lineages/pangolin); Rambaut  
70 et al., 2020).

71

72

### 73 **PUBLIC AVAILABILITY AND ACCESSION NUMBERS**

74 The consensus sequence assemblies reported in this study are deposited in the [EpiCoV™ database of](#)  
75 [the GISAID](#). The accession codes are shown in **Table 1**.

76

77

### 78 **ACKNOWLEDGEMENT**

79 This project was supported by a Genomics Biosurveillance grant from the Philippine Department of  
80 Health, and a Department of Science and Technology – Philippine Council for Health Research and  
81 Development grant to BM and the University of the Philippines. The authors would also like to thank the  
82 contributing institutions to the Philippine Genomic Biosurveillance Network.

83

84 The protocols used in this study were reviewed and approved by the Single Joint Research Ethics Board  
85 of the Department of Health, with approval code SJREB-2021-11, as part of a larger research program  
86 entitled “A retrospective study on the national genomic surveillance of COVID-19 transmission in the  
87 Philippines by SARS-CoV-2 genome sequencing and bioinformatics analysis”.

88 **REFERENCES**

- 89 Grabowski F., Preibisch G., Kochanczyk M., and Lipniacki T. (2021). SARS-CoV-2 Variant Under  
90 Investigation 202012/01 has more than twofold replicative advantage. medRxiv.  
91 DOI: <https://doi.org/10.1101/2020.12.28.20248906>.
- 92 Grubaugh N., Gangavarapu K., Quick J., et al. (2019). An amplicon-based sequencing framework for  
93 accurately measuring intrahost virus diversity using PrimalSeq and iVar. *Genome Biology*. 20(8).  
94 DOI: <https://doi.org/10.1186/s13059-018-1618-7>.
- 95 Kirby T. (2021). New variant of SARS-COV-2 in UK causes surge of COVID-19. *Lancet Respiratory*  
96 *Medicine*. DOI: [https://doi.org/10.1016/S2213-2600\(21\)00005-9](https://doi.org/10.1016/S2213-2600(21)00005-9).
- 97 Kurtz S., Phillippy A., Delcher A., Smoot M., Shumway M., Antonescu C., and Salzberg S. (2004). Versatile  
98 and open software for comparing large genomes. *Genome Biology*. 5:R12.
- 99 Leung K., Shum M., Leung G., Lam T., and Wu J. (2021). Early transmissibility assessment of the N501Y  
100 mutant strains of SARS-CoV-2 in the United Kingdom, October to November 2020. *EuroSurveillance*.  
101 26(1):pii=2002106. DOI: <https://doi.org/10.2807/1560-7917.ES.2020.26.1.2002106>.
- 102 Li H. (2018). Minimap2: pairwise alignment for nucleotide sequences. *Bioinformatics*. 34:3094-3100.  
103 doi:10.1093/bioinformatics/bty191.
- 104 Otto T., Dillon G., Degraeve W., and Berriman M. (2011). RATT: rapid annotation transfer tool. *Nucleic*  
105 *Acids Research*. 39(9):e57. DOI: <https://doi.org/10.1093/nar/gkq1268>.
- 106 Rambaut, A., Holmes, E.C., O'Toole, Á. et al. (2020). A dynamic nomenclature proposal for SARS-CoV-2  
107 lineages to assist genomic epidemiology. *Nature Microbiology*. 5:1403–140.  
108 DOI: <https://doi.org/10.1038/s41564-020-0770-5>.
- 109 Shu, Y., and McCauley, J. (2017). GISAID: Global initiative on sharing all influenza data – from vision to  
110 reality. *EuroSurveillance*. 22(13). DOI:10.2807/1560-7917.ES.2017.22.13.30494.

**Table 1. Primary consensus sequence assembly metrics.**

| Sample Code  | GISAID Accession Code           | Collection Date | % GC Content | Sample Source | Mean Coverage Depth | # Consensus SNPs | # B.1.1.7 SNPs | % N   | Length |
|--------------|---------------------------------|-----------------|--------------|---------------|---------------------|------------------|----------------|-------|--------|
| PH-PGC-00315 | <a href="#">EPI_ISL_1081793</a> | 29-Dec-20       | 37.32        | ROF           | 1,201.27            | 52               | 17             | 1.76  | 29,884 |
| PH-PGC-00317 | <a href="#">EPI_ISL_1081794</a> | 29-Dec-20       | 37.48        | ROF           | 1,194.12            | 50               | 17             | 1.30  | 29,884 |
| PH-PGC-00401 | <a href="#">EPI_ISL_1081795</a> | 10-Dec-20       | 37.22        | ROF           | 996.07              | 51               | 17             | 2.12  | 29,884 |
| PH-PGC-00986 | <a href="#">EPI_ISL_1081796</a> | 7-Jan-21        | 37.14        | ROF           | 1,164.12            | 50               | 17             | 2.26  | 29,884 |
| PH-PGC-02005 | <a href="#">EPI_ISL_1081797</a> | 4-Jan-21        | 31.86        | CAR           | 508.19              | 44               | 14             | 16.82 | 29,884 |
| PH-PGC-02008 | <a href="#">EPI_ISL_1081798</a> | 3-Jan-21        | 35.45        | CAR           | 740.89              | 48               | 17             | 6.87  | 29,884 |
| PH-PGC-02009 | <a href="#">EPI_ISL_1081799</a> | 3-Jan-21        | 34.31        | CAR           | 689.44              | 45               | 14             | 10.19 | 29,884 |
| PH-PGC-02033 | <a href="#">EPI_ISL_1081800</a> | 5-Jan-21        | 37.38        | CAR           | 1,362.04            | 49               | 17             | 1.52  | 29,884 |
| PH-PGC-02127 | <a href="#">EPI_ISL_1081801</a> | 7-Jan-21        | 33.83        | CAR           | 973.77              | 45               | 14             | 11.36 | 29,884 |
| PH-PGC-02131 | <a href="#">EPI_ISL_1081802</a> | 7-Jan-21        | 36.53        | CAR           | 1,326.01            | 49               | 17             | 3.77  | 29,885 |
| PH-PGC-02133 | <a href="#">EPI_ISL_1081803</a> | 7-Jan-21        | 34.19        | CAR           | 892.30              | 49               | 16             | 10.20 | 29,884 |
| PH-PGC-02152 | <a href="#">EPI_ISL_1081804</a> | 9-Jan-21        | 36.16        | CAR           | 1,086.44            | 38               | 16             | 4.80  | 29,884 |
| PH-PGC-02181 | <a href="#">EPI_ISL_1081805</a> | 8-Jan-21        | 36.40        | CAR           | 882.19              | 50               | 17             | 4.18  | 29,884 |
| PH-PGC-02183 | <a href="#">EPI_ISL_1081806</a> | 8-Jan-21        | 37.06        | CAR           | 1,210.23            | 51               | 17             | 2.42  | 29,884 |
| PH-PGC-02184 | <a href="#">EPI_ISL_1081807</a> | 8-Jan-21        | 35.20        | CAR           | 891.29              | 48               | 16             | 7.54  | 29,884 |
| PH-PGC-02185 | <a href="#">EPI_ISL_1081808</a> | 8-Jan-21        | 37.33        | CAR           | 1,131.33            | 49               | 17             | 1.69  | 29,884 |
| PH-PGC-02225 | <a href="#">EPI_ISL_1081809</a> | 8-Jan-21        | 37.13        | CAR           | 1,303.29            | 51               | 17             | 2.14  | 29,884 |
| PH-PGC-02408 | <a href="#">EPI_ISL_1081810</a> | 7-Jan-21        | 37.92        | ROF           | 1,652.89            | 51               | 17             | 0.10  | 29,884 |
| PH-PGC-02434 | <a href="#">EPI_ISL_1081811</a> | 12-Jan-21       | 37.70        | ROF           | 1,168.26            | 53               | 17             | 0.78  | 29,884 |
| PH-PGC-02630 | <a href="#">EPI_ISL_1081812</a> | 16-Jan-21       | 37.83        | ROF           | 1,307.23            | 48               | 17             | 0.41  | 29,884 |
| PH-PGC-02725 | <a href="#">EPI_ISL_1081813</a> | 14-Jan-21       | 37.16        | ROF           | 1,140.03            | 52               | 17             | 2.04  | 29,884 |
| PH-PGC-02730 | <a href="#">EPI_ISL_1081814</a> | 16-Jan-21       | 37.87        | ROF           | 1,620.34            | 52               | 17             | 0.13  | 29,884 |

ROF – Returning Overseas Filipino

CAR – Cordillera Administrative Region

NCR – National Capital Region

NM – Northern Mindanao

% N – Percentage of ambiguous base calls (“N” content) in the consensus sequence assembly. High % N values lead to lower % GC content.

| Sample Code  | NCBI Accession Code             | Collection Date | % GC Content | Sample Source | Mean Coverage Depth | # Consensus SNPs | # B.1.1.7 SNPs | % N   | Length |
|--------------|---------------------------------|-----------------|--------------|---------------|---------------------|------------------|----------------|-------|--------|
| PH-PGC-02732 | <a href="#">EPI_ISL_1081815</a> | 17-Jan-21       | 37.89        | ROF           | 724.58              | 52               | 17             | 0.25  | 29,884 |
| PH-PGC-02733 | <a href="#">EPI_ISL_1081816</a> | 17-Jan-21       | 37.88        | ROF           | 1,499.29            | 51               | 17             | 0.15  | 29,884 |
| PH-PGC-02740 | <a href="#">EPI_ISL_1081817</a> | 19-Jan-21       | 32.63        | ROF           | 769.66              | 30               | 12             | 14.07 | 29,894 |
| PH-PGC-02745 | <a href="#">EPI_ISL_1081818</a> | 19-Jan-21       | 30.64        | ROF           | 679.99              | 32               | 12             | 19.71 | 29,894 |
| PH-PGC-02756 | <a href="#">EPI_ISL_1081819</a> | 15-Jan-21       | 37.01        | CAR           | 1,037.94            | 50               | 17             | 2.23  | 29,884 |
| PH-PGC-02770 | <a href="#">EPI_ISL_1081820</a> | 15-Jan-21       | 35.34        | ROF           | 971.34              | 44               | 14             | 6.34  | 29,885 |
| PH-PGC-02793 | <a href="#">EPI_ISL_1081821</a> | 19-Jan-21       | 37.65        | ROF           | 1,290.90            | 50               | 17             | 0.90  | 29,884 |
| PH-PGC-02812 | <a href="#">EPI_ISL_1081822</a> | 24-Jan-21       | 37.91        | CAR           | 1,654.09            | 50               | 17             | 0.18  | 29,884 |
| PH-PGC-02826 | <a href="#">EPI_ISL_1081823</a> | 21-Jan-21       | 37.85        | CAR           | 1,346.54            | 52               | 17             | 0.31  | 29,884 |
| PH-PGC-02845 | <a href="#">EPI_ISL_1081824</a> | 13-Jan-21       | 37.74        | CAR           | 1,454.34            | 51               | 17             | 0.58  | 29,884 |
| PH-PGC-02851 | <a href="#">EPI_ISL_1081825</a> | 11-Jan-21       | 37.87        | CAR           | 1,563.14            | 49               | 17             | 0.28  | 29,884 |
| PH-PGC-02886 | <a href="#">EPI_ISL_1081826</a> | 16-Jan-21       | 37.67        | CAR           | 1,411.43            | 51               | 17             | 0.86  | 29,884 |
| PH-PGC-03690 | <a href="#">EPI_ISL_1081829</a> | 22-Dec-20       | 19.13        | Calabarzon    | 421.38              | 20               | 5              | 50.35 | 29,900 |
| PH-PGC-03846 | <a href="#">EPI_ISL_1081830</a> | 24-Jan-21       | 37.87        | ROF           | 1,458.88            | 49               | 17             | 0.16  | 29,884 |
| PH-PGC-03939 | <a href="#">EPI_ISL_1081831</a> | 31-Jan-21       | 37.89        | ROF           | 2,082.45            | 50               | 16             | 0.27  | 29,885 |
| PH-PGC-03978 | <a href="#">EPI_ISL_1081832</a> | 25-Jan-21       | 37.25        | NCR           | 990.68              | 53               | 16             | 2.01  | 29,884 |
| PH-PGC-03995 | <a href="#">EPI_ISL_1081841</a> | 25-Jan-21       | 23.29        | NM            | 206.76              | 22               | 7              | 37.77 | 29,896 |

ROF – Returning Overseas Filipino

CAR – Cordillera Administrative Region

NCR – National Capital Region

NM – Northern Mindanao

% N – Percentage of ambiguous base calls (“N” content) in the consensus sequence assembly. High % N values lead to lower % GC content.
